# Supplementary material
Source: publisher figshare collection journal article supplement (https://tandf.figshare.com/articles/dataset/_/5493184)
Supplement: Supplementary file 1 [file 1]

Sequence of RACE PCR product

GAGGATAGGGTTGAGTGGTTGTTCCAGGTTTGGAAACAAGGGTCCCACTATTAAAGGAACGTGGACTCCAACGTCAAAG  
GGCGAAAACCGTCTATCAGGGCGATGGCCACTACGTGAACCATCACCTAATCAAGTTTTTTGGGGTCGAGGTGCCGTAA  
AGCACTAAATCGGAACCCTAAAGGGAGCCCCGATTTAGAGCTTGACGGGGAAAGCCGGCGAACGTGGCGAGAAAGGA  
AGGGAAGAAAGCGAAAGGAGCGGGCGCTAGGGCGCTGGCAAGTGTAGCGGTCACGCTGCGCGTAACCACCACACCCG  
CCGCGCTTAATGCGCCGCTACAGGGCGCGTCCATTGCGCATTAGGCTGCGCAACTGTTGGGAAGGGCGATCGGTGCGG  
GCCTCTTCGCTATTACGCCAGCTGGCGAAAGGGGGATGTGCTGCAAGGCGATTAAGTTGGGTAACGCCAGGGTTTTCCC  
AGTCACGACGTTGTAAACGACGGCCAGTGAATTGTAATACGACTCACTATAGGGC**AAGCAGTGGTATCAACGCAGAGT**  
**ACGCGGGG**ATATAAACTTAGGTCTTCTTCTTCTTCAACAATATTAGGGTTTTGTCATATTGATAGCGTAGACTACTA  
TCAGTTGAAGCTGCCAGCATGATCTAAACTTACCTATAAATTTATATTAAGGCAAGATCAGATCATGTGGTTGCTTCACCT  
GTTAGTTCGTACTACGAAAAATAATCTTAACCCTACTTCGTGGAGAAAGAACTAAATTTAAGGGTCTGAAGATGGATT  
AAAGCTAATCACTAGTGAATTGCGGGCCGCCTGCAGGTCGACCATATGGGAGAGCTCCCCCAACCGCA

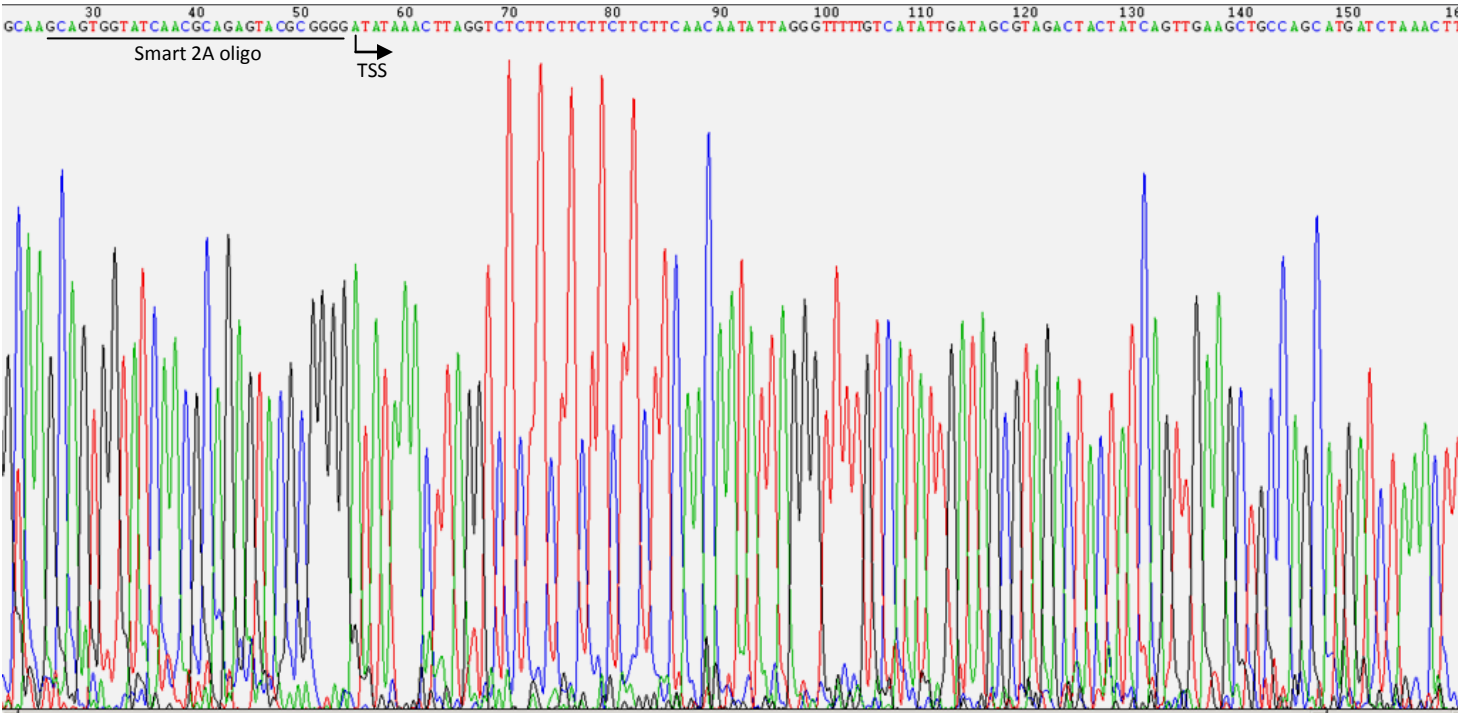

**Supplementary figure 4.** Identification of transcription start site of the *MIR167a* gene. The upper panel shows sequence of the cloned PCR product of 5'-RACE. Red font and yellow highlighted sequence is the sequence of the SmartIIA oligo used in RACE analysis, underlined sequence region is the *MIR167a* transcript sequence. Green and bold font base "A" is the transcription start site. In the lower panel chromatogram of sequencing data of RACE-product clone is shown. Underlined sequence is SmartIIA oligo and Arrow indicates the position of transcription start site. Upstream sequence of this transcription start site was considered as promoter region.
