# Supplementary material
Source: publisher figshare collection journal article supplement (https://tandf.figshare.com/articles/dataset/_/5493184)
Supplement: Supplementary file 2 [file 1]

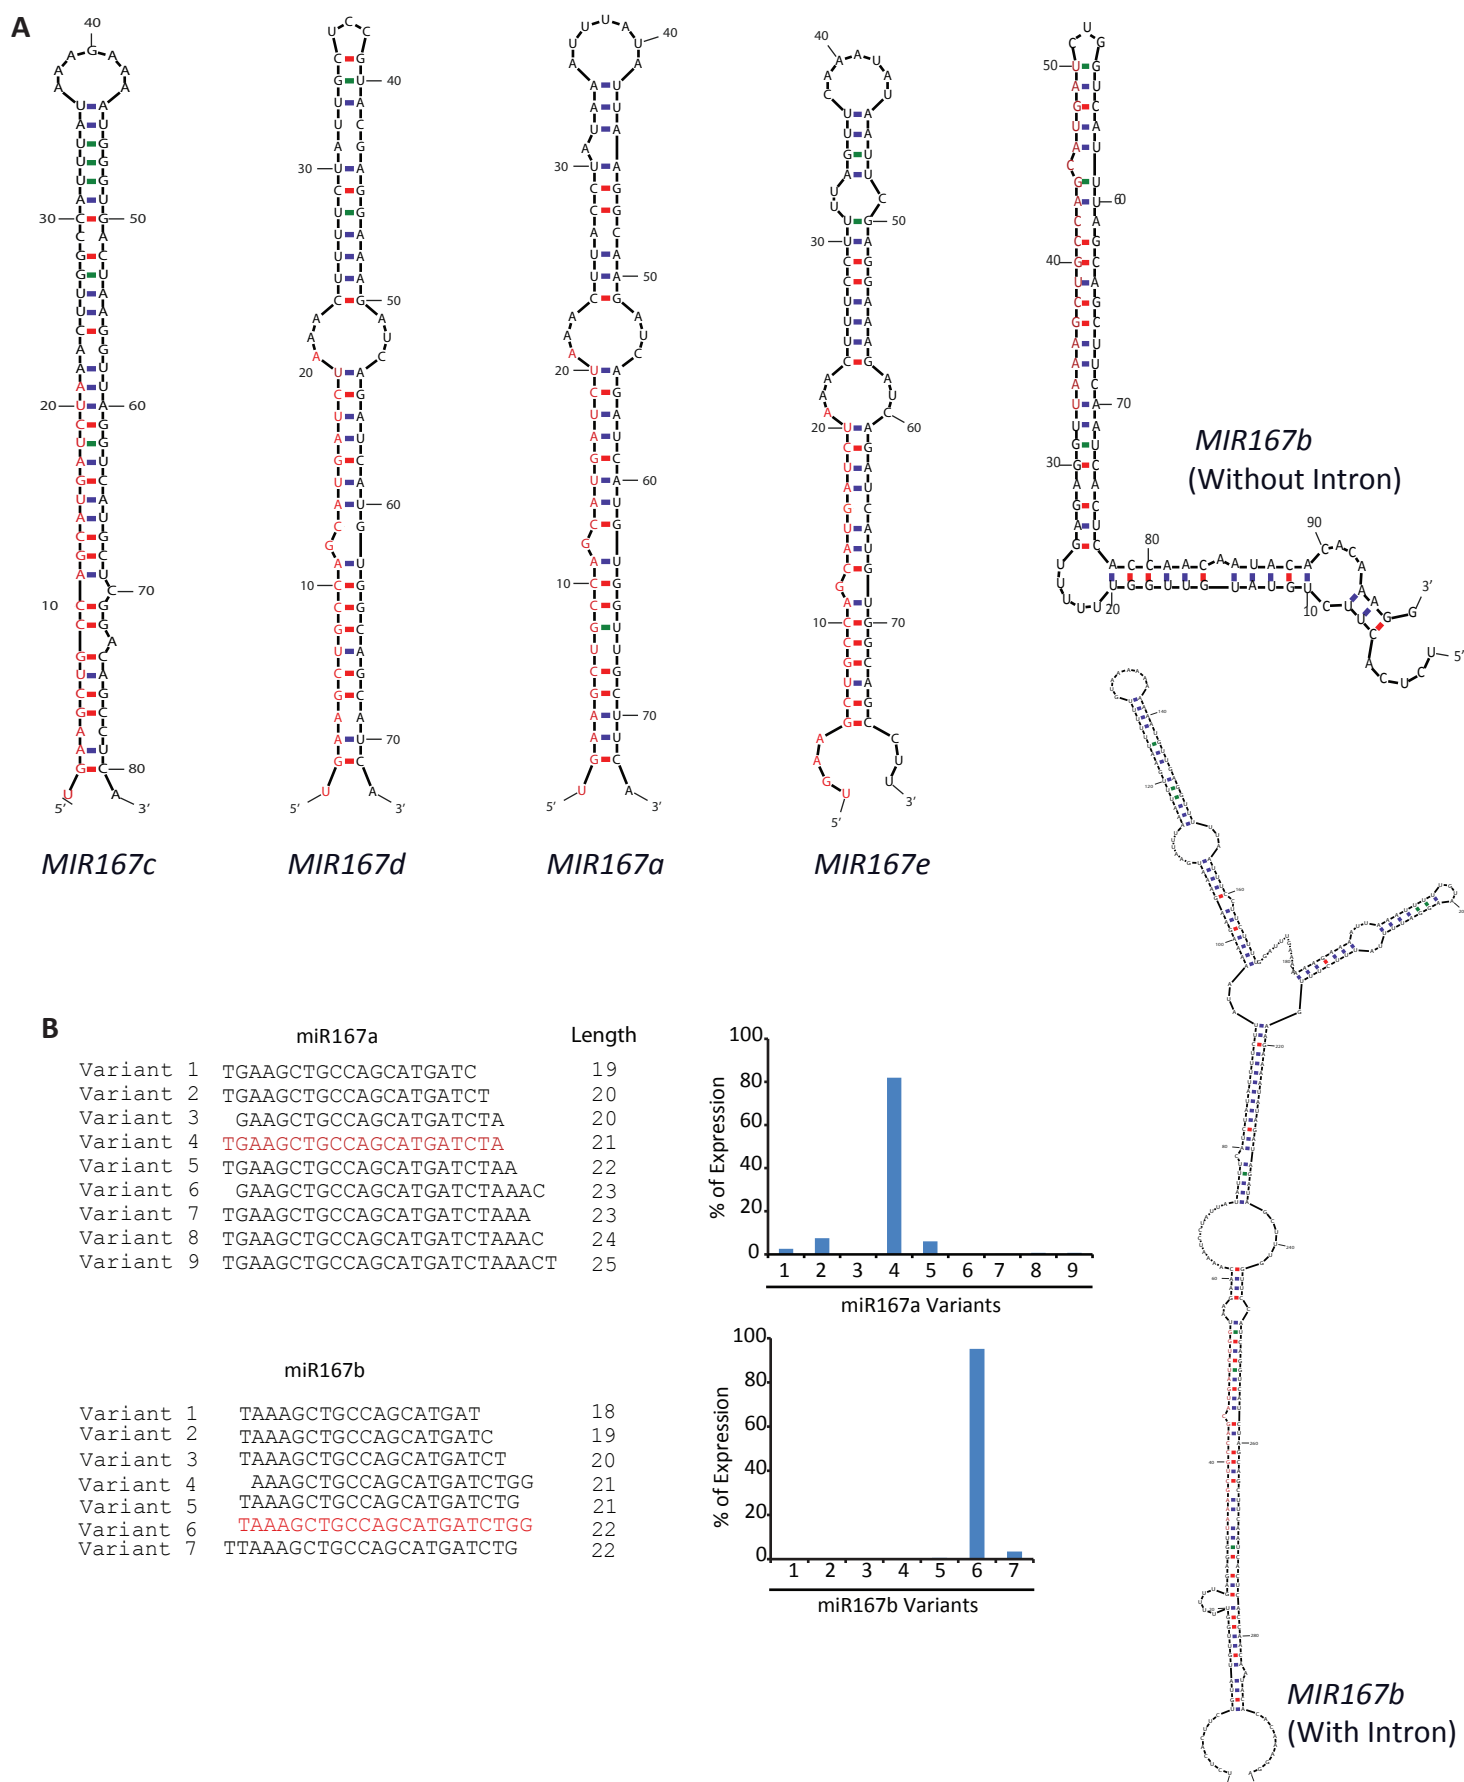

**Supplementary figure 1.** miR167 homologs and isoforms, relative expression level of their slice variants. A, Predicted stem-loop structures of precursors of *MIR167* as generated by mFold Software. B, Different variants of mature miR167a and miR167b found in tomato as detected by NGS analysis (n=2 plants). Bar diagram shows the percentage of expression of different sized variants. 21 and 22 nucleotides variant is predominant for miR167a and miR167b, respectively.
