# Supplementary material
Source: publisher figshare collection journal article supplement (https://tandf.figshare.com/articles/dataset/_/5493184)
Supplement: Supplementary file 4 [file 1]

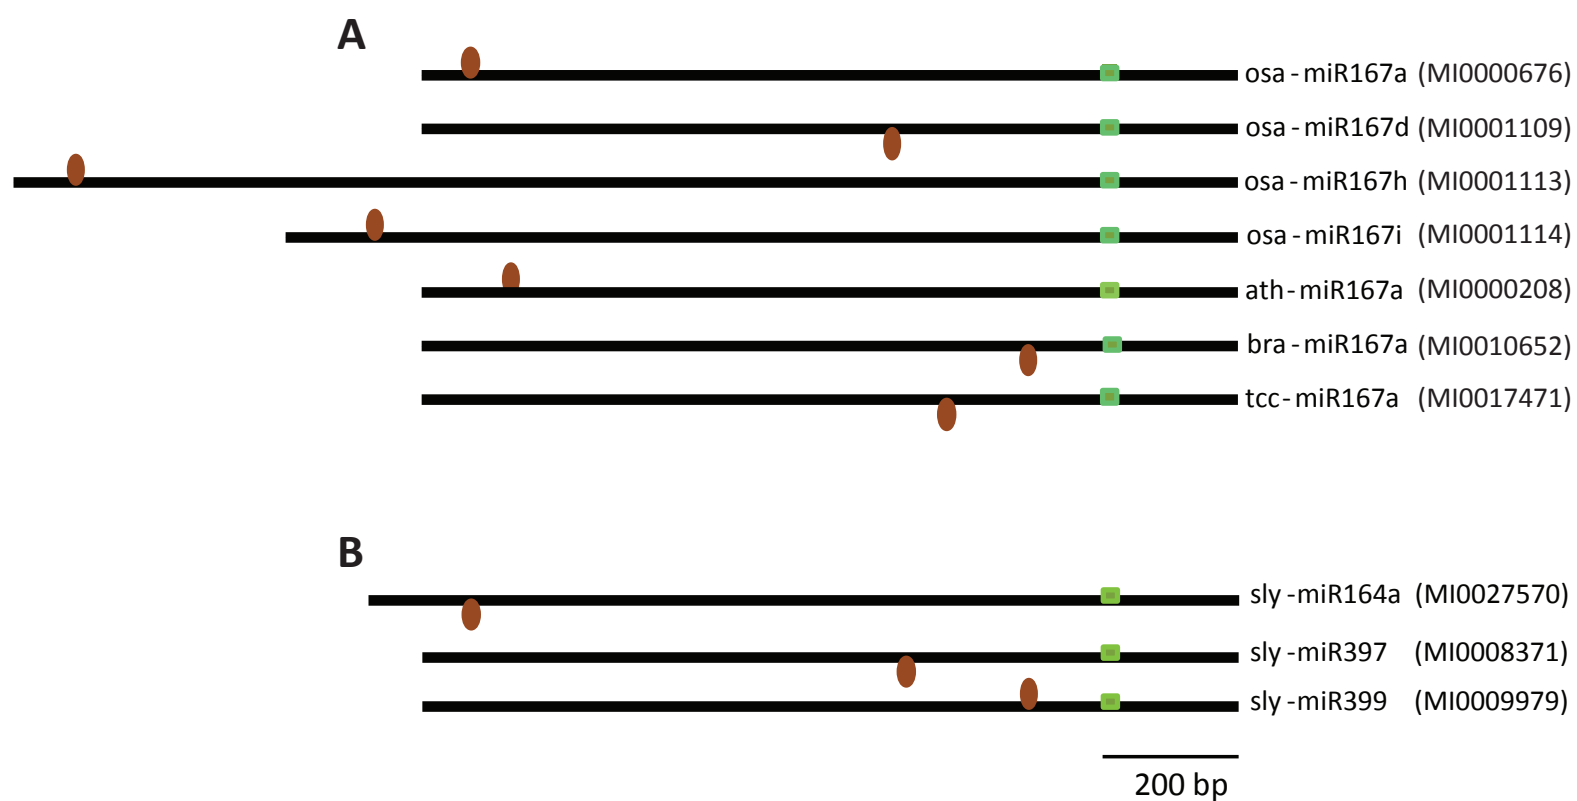

**Supplementary figure 9.** DREB binding sites in *MIR* gene promoters. A, DREB binding sites present in *MIR167* promoter of various plant species. B, DREB binding sites in promoter of various *MIR* genes in tomato. Brown elliptical shape indicates the position of DREB binding sites in sense (above the line) or antisense strand (below the line). Green box, mature-miRNA.
