# Supplementary material
Source: publisher figshare collection journal article supplement (https://tandf.figshare.com/articles/dataset/_/5493184)
Supplement: Supplementary file 5 [file 1]

**Supplementary table 1.** List of primers used in different experiments.

| Primer Name               | Orientation | Primer Sequence                    | Application                                          |
|---------------------------|-------------|------------------------------------|------------------------------------------------------|
| mature-miR167F            | Forward     | TGAAGCTGCCAGCATGATC                | PCR amplification of miR167                          |
| mature-miR167aF           | Forward     | TCGCGTGAAGCTGCCAGCAT               | PCR amplification of miR167a                         |
| mature-miR167bF           | Forward     | TCGCGTAAAGCTGCCAGCATG              | PCR amplification of miR167b                         |
| pre-miR167a R             | Reverse     | ACCACATGATCTGATCTTGCCTTAA          | PCR amplification of pre- <i>MIR167a</i>             |
| pre-miR167c R             | Reverse     | CCGAGCATGACCTAACCTTAGTCACC         | PCR amplification of pre- <i>MIR167c</i>             |
| pre-miR167d R             | Reverse     | CACATGATCTGATCTTTCCTCGTAC          | PCR amplification of pre- <i>MIR167d</i>             |
| pre-miR167e R             | Reverse     | CACATGATCTGATCTTTCCTCGAAT          | PCR amplification of pre- <i>MIR167e</i>             |
| pri-miR167a R             | Reverse     | AGCTTTAATCCATCTTCAGACCCCTT         | PCR amplification of pri- <i>MIR167a</i>             |
| miR167b-WOI-F             | Forward     | GCTGCCAGCATGATCTGGTCATC            | PCR amplification of pri- <i>MIR167b</i> (WOI)       |
| miR167b-WI-F              | Forward     | TCTCACTTCTGTATGTTGG                | PCR amplification of pri- <i>MIR167b</i> (WI)        |
| pri-miR167bR              | Reverse     | GAAGGGAAGAAGATAATCAACAG            | PCR amplification of pri- <i>MIR167b</i>             |
| Full length pre-miR167a-F | Forward     | TTTTTTCCATGGAGGGTTTGTGCATATTGATAGC | PCR amplification of full length pre- <i>MIR167a</i> |
| Full length pre-miR167a-R | Reverse     | TTTTTTGGTGACCTCTCCACGAAGTAGGGTTAAG |                                                      |
| AV1-F                     | Forward     | GGATCCATGTCTGAAGCGACCAGCAG         | PCR amplification of ToLCNDV coat protein (AV1) Gene |
| AV1-R                     | Reverse     | GAATTCTTAGTTTGTGACTGAGTC           |                                                      |
| PR1a-F                    | Forward     | GAGGGCAGCCGTGCAA                   | PCR amplification of PR1a                            |
| PR1a-R                    | Reverse     | CACATTTTTCCACCAACACATTG            |                                                      |
| IAA1-F                    | Forward     | CCACCTGTTGCCAAGGCAC                | PCR amplification of IAA1                            |
| IAA1-R                    | Reverse     | GCAGGGGCAAATTCAGAGCCTTTA           |                                                      |
| ABA2-F                    | Forward     | CTGATACTTCTCTTCCTATCCAAAGGTTAT     | PCR amplification of ABA2                            |
| ABA2-R                    | Reverse     | CAGCTTCTACAGTCACATCACAGTGG         |                                                      |

|                              |         |                                                    |                                                  |
|------------------------------|---------|----------------------------------------------------|--------------------------------------------------|
| NCED-F                       | Forward | GTAAAGGTAACACCCACCGGCG                             | PCR amplification of NCED                        |
| NCED-R                       | Reverse | GACGACGAAGTTCTCAGTAATTGCGAA                        |                                                  |
| Pin2-F                       | Forward | TGATGCCAAGGCTTGTACTAGAGA                           | PCR amplification of Pin2                        |
| Pin2-R                       | Reverse | AGCGGACTTCCTTCTGAACGT                              |                                                  |
| SIDREB2a-F                   | Forward | TTTTTTGAATTCATGGCTGTGCTTGATCGAAC                   | PCR amplification of DREB2A                      |
| SIDREB2a-R                   | Reverse | TTTTTTGTCGACTTAGAAATCCAAGACATCCAACCTC              |                                                  |
| SICBF1-F                     | Forward | AGCATTAAGAGGCCGTTCTGC                              | PCR amplification of CBF1                        |
| SICBF1-R                     | Reverse | AAGATCGCCTCCTCATCCACG                              |                                                  |
| SIHsfA-F                     | Forward | AACTCCGAAGGCTCTCAATTC                              | PCR amplification of HsfA                        |
| SIHsfA-R                     | Reverse | GCTGCTACGACTATCCCATAAC                             |                                                  |
| SIEF1a-F                     | Forward | TGATCTGCTGTAACAAGATGG                              | PCR amplification of <i>EF1a</i>                 |
| SIEF1a-R                     | Reverse | GTCAAGAGCCTCAAGGAGGGTTG                            |                                                  |
| mat-miR167a-stem loop        | Reverse | GTCGTATCCAGTGCAGGGTCCGAGGTATTCGCACTGGATACGACTAGATC | Stem-loop cDNA synthesis for                     |
| mat-miR167b-stem loop        | Reverse | GTCGTATCCAGTGCAGGGTCCGAGGTATTCGCACTGGATACGACCCAGAT | Stem-loop cDNA synthesis for                     |
| Slp-UPR                      | Reverse | CCAGTGCAGGGTCCGAGGTA                               | PCR amplification of mature-miR167               |
| U6-F                         | Forward | GGGGACATCCGATAAAATTGG                              | PCR amplification of U6 gene                     |
| U6-R                         | Reverse | GGACCATTTCTCGATTTATGCG                             |                                                  |
| SIARF6-F                     | Forward | TTGGGGATACGACGTGCCAATC                             | PCR amplification of Auxin Response Factor 6     |
| SIARF6-R                     | Reverse | ATTCTGATGGACAAGCCCTTGG                             |                                                  |
| SIARF8-F                     | Forward | CCCATACATTTGTCAAGGTTTAC                            | PCR amplification of Auxin Response Factor 8     |
| SIARF8-R                     | Reverse | AATACAAGCTGCCAGCCTGATC                             |                                                  |
| SMART II A Oligonucleotide   | Forward | AAGCAGTGGTATCAACGCAGAGTACGCGGG                     | RACE-cDNA synthesis                              |
| 5'-RACE CDS Primer A         | Forward | TTTTTTTTTTTTTTTTTVN                                | RACE-cDNA synthesis                              |
| Universal Primer A1 (UPM A1) | Forward | CTAATACGACTCACTATAGGGCAAGCAGTGGTATCAACGCAGAGT      | Long forward primer for RACE PCR                 |
| Universal Primer A2 (UPM A2) | Forward | CTAATACGACTCACTATAGGGC                             | Short forward primer for RACE PCR                |
| P(-316/+72)-miR167aF         | Forward | TTTTTTCTGCAGTCATACATTGTTTCAGCGAGTG                 | PCR amplification of P(-316/+72)- <i>MIR167a</i> |
| P(-576/+72)-miR167aF         | Forward | TTTTTTCTGCAGCTCCGTCTATTTTACATGTTC                  | PCR amplification of P(-576/+72)- <i>MIR167a</i> |
| P(-783/+72)-miR167aF         | Forward | TTTTTTCTGCAGTCGCGATTAGGATGAAAGGGTC                 | PCR amplification of P(-783/+72)- <i>MIR167a</i> |

|                        |         |                                                                         |                                                   |
|------------------------|---------|-------------------------------------------------------------------------|---------------------------------------------------|
| P(1172-/ +72)-miR167aF | Forward | TTTTTTCTGCAGGGGACATATACAAAGAGTGACAATTGCC                                | PCR amplification of P(-1172/+72)- <i>MIR167a</i> |
| P-miR167aR             | Reverse | TTTTTTGGATCCAGTCTACGCTATCAATATGACAAAACC                                 | PCR amplification of miR167a promoter             |
| GUS-F                  | Forward | GGCATTTCAGTCTGGATCGCGA                                                  | PCR amplification of GUS gene                     |
| GUS-R                  | Reverse | CGTGGTTACAGTCTTGCGCGAC                                                  |                                                   |
| miR167a-LNA probe      | Reverse | T+ <b>A</b> GAT+ <b>CA</b> + <b>T</b> GCTG+ <b>G</b> CAGC+ <b>T</b> TCA | RNA gel bot analysis of mature-miR167a            |
| U6 probe               | Reverse | AGGGGCCATGCTAATCTTCTCTGTATCGTTCCAATTTTAT                                | RNA gel blot analysis of U6 gene                  |
