# Supplementary material
Source: publisher figshare collection journal article supplement (https://tandf.figshare.com/articles/dataset/_/5493184)
Supplement: Supplementary file 6 [file 1]

A

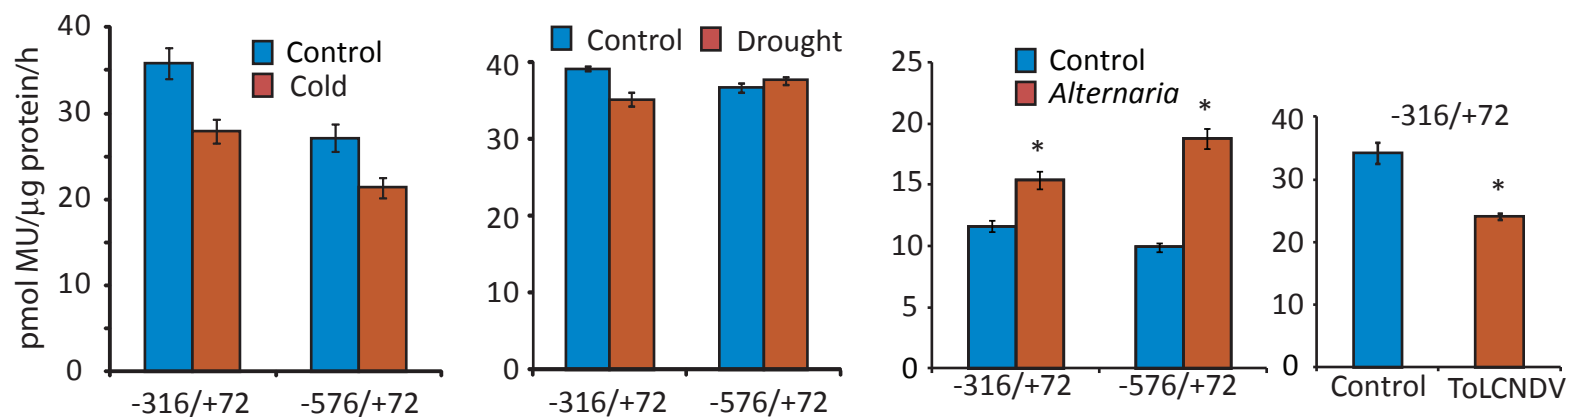

B

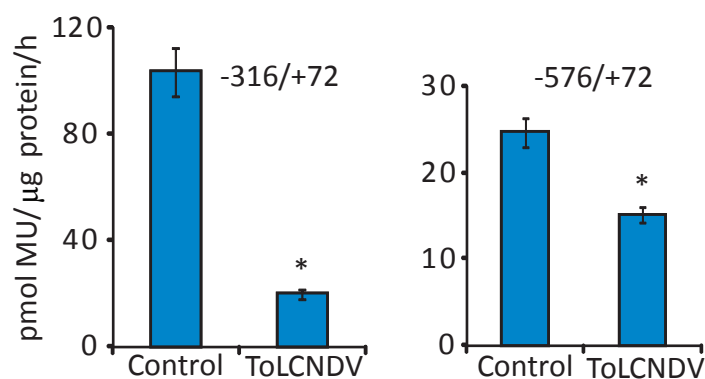

C

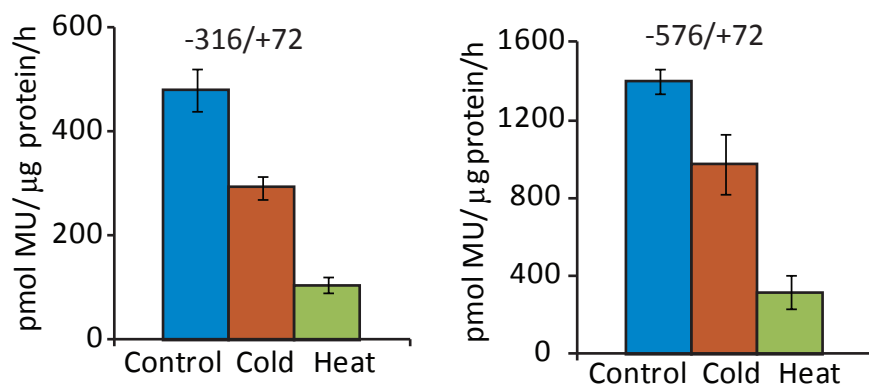

D

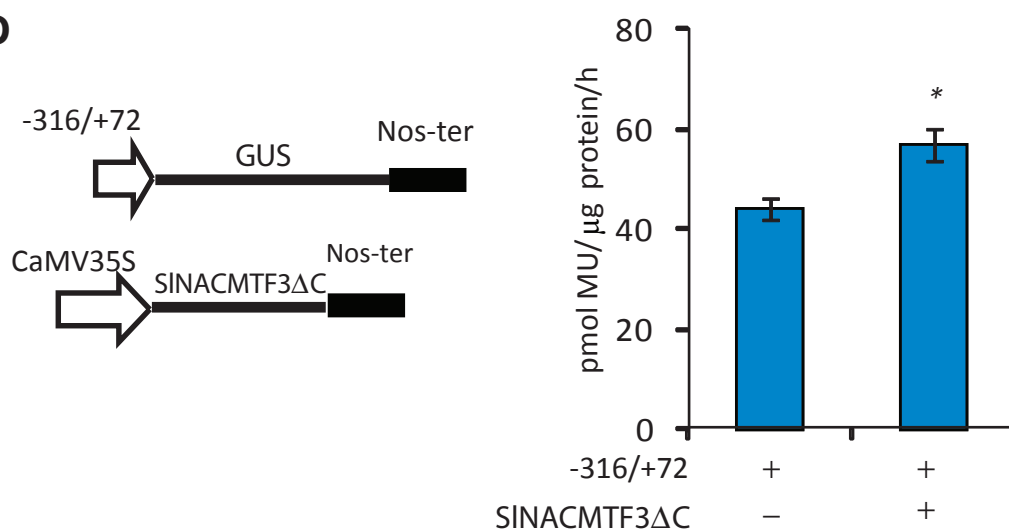

**Supplementary figure 8.** *MIR167a* promoter activity assay under different conditions. A, GUS activity obtained from tomato leaves infiltrated with promoter constructs and inoculated with cold, drought, *Alternaria solani* and ToLCNDV, B, Promoter activity assays after agroinfiltration of infectious ToLCNDV clones to transgenic plants. C, Promoter activity assays performed with T2 generation transgenic plants. D, Left panel, scheme showing promoter and inducer constructs used in the assay. Right panel, GUS reporter assay showing the -316/+72 promoter activity upon coinfiltration with NAC expression construct.
