# Supplementary material
Source: publisher figshare collection journal article supplement (https://tandf.figshare.com/articles/dataset/_/5493184)
Supplement: Supplementary file 7 [file 1]

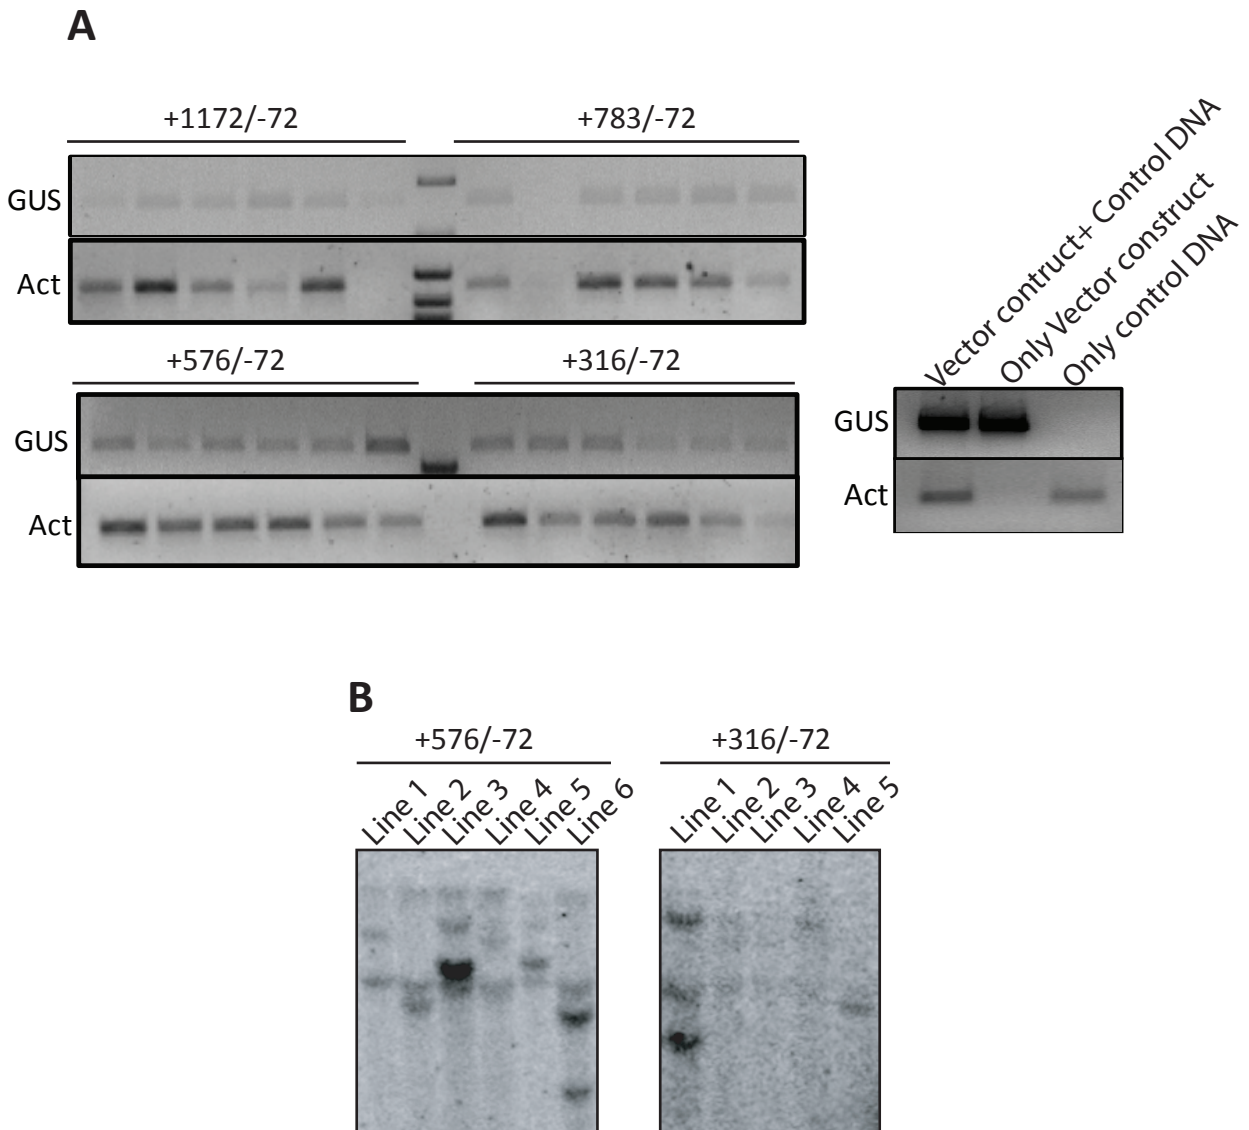

**Supplementary figure 7.** Confirmation of transgene integration in transformed tobacco plants. A, Agarose gel picture showing resolved band of product of GUS-gene specific PCR performed with genomic DNA of different lines. B, DNA gel blot analysis performed with GUS gene specific probe and genomic DNA of different lines.
