# Supplementary material
Source: publisher figshare collection journal article supplement (https://tandf.figshare.com/articles/dataset/_/5493184)
Supplement: Supplementary file 8 [file 1]

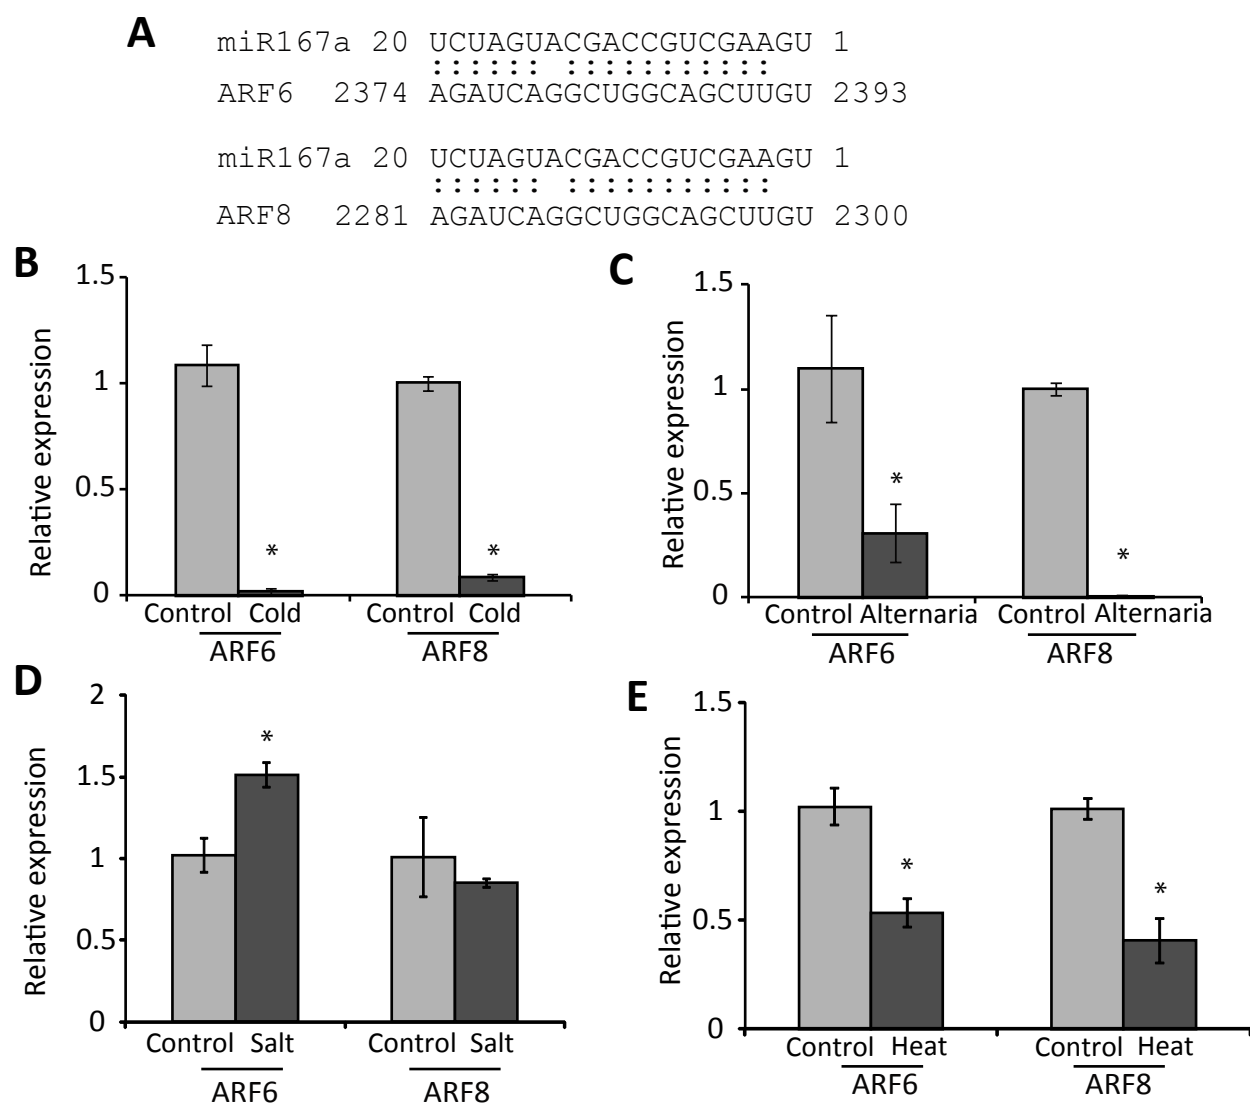

**Supplementary figure 2.** Expression level of targets of miR167a. A, target sites of miR167a in ARF6 and ARF8 genes. Real-time PCR data showing expression level of ARF6 and ARF8 under cold stress (C), Alternaria infection (D), salt stress (E), and heat stress (F). \*, indicates significantly different.
