# Supplementary material
Source: publisher figshare collection journal article supplement (https://tandf.figshare.com/articles/dataset/_/5493184)
Supplement: Supplementary file 9 [file 1]

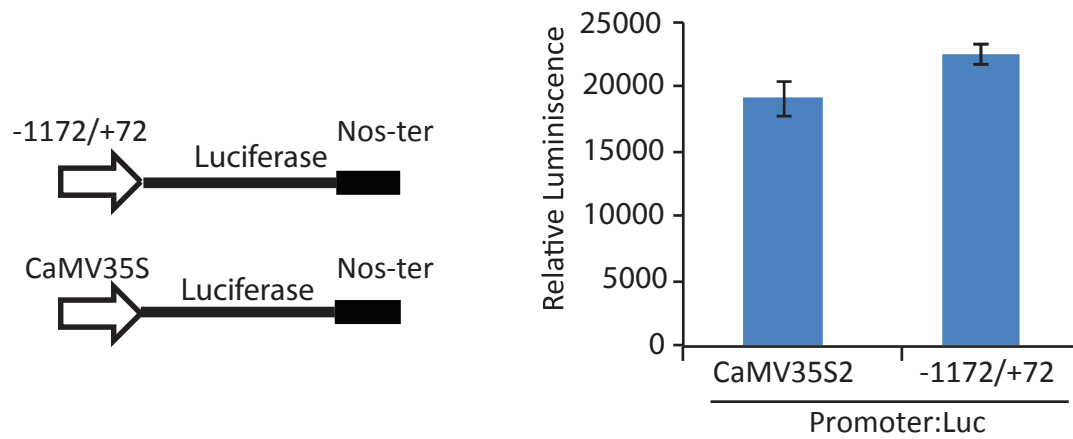

**Supplementary figure 6.** Relative activity of CaMV35S<sup>2</sup> and *MIR167a* promoter. Left panel, promoter:reporter expression cassettes used for promoter activity assays. Right panel, relative activity of CaMV35S<sup>2</sup> and *MIR167a* promoters as obtained by luciferase reporter assay using transiently transformed protoplasts.
