# Supplementary material
Source: publisher figshare collection journal article supplement (https://tandf.figshare.com/articles/dataset/_/5493184)
Supplement: Supplementary file 10 [file 1]

**Supplementary table 2.** List of marker genes for stresses/treatments used in this study.

| Stresses/treatments  | Gene name | Function                           | Gene ID        |
|----------------------|-----------|------------------------------------|----------------|
| Salt                 | ABA2      | ABA biosynthesis-related protein 2 | XM_004237780.2 |
| Drought              | NCED      | 9-cis-epoxycarotenoid dioxygenase  | NM_001247526.2 |
| Cold                 | CBF1      | The C-repeat-binding factor        | NM_001247194.2 |
| Heat                 | HsfA      | Heat shock factor A                | NM_001247925.2 |
| Alternaria infection | PR1a      | Pathogenesis-related protein 1a    | NM_001247594.2 |
| Auxin                | IAA1      | Auxin transduction                 | NM_001279108.1 |
| Absciscic acid       | ABA2      | ABA biosynthesis-related protein 2 | XM_004237780.2 |
| Salicylic acid       | PR1a      | Pathogenesis-related protein 1a    | NM_001247594.2 |
| Jasmonic acid        | PIN2      | Proteinase inhibitor II            | JN091682.1     |
| Ethylene             | DREB2A    | ERF/AP2 transcription factor       | HQ698902.1     |
