# Supplementary material
Source: publisher figshare collection journal article supplement (https://tandf.figshare.com/articles/dataset/_/5493184)
Supplement: Supplementary file 11 [file 1]

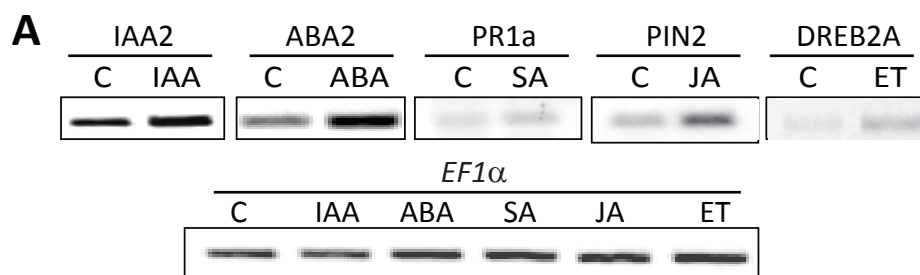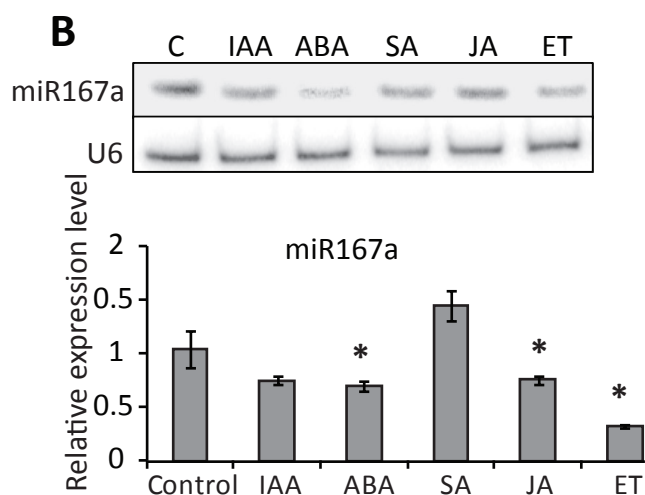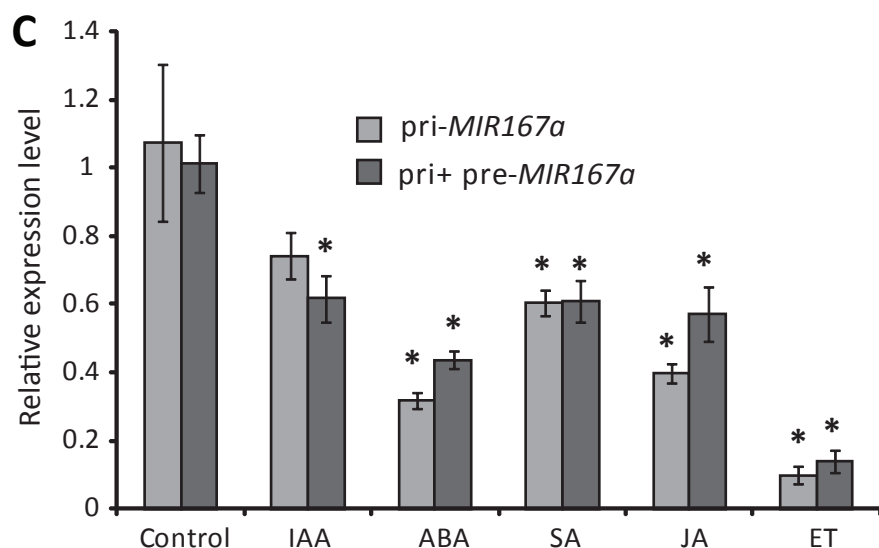

**Supplementary figure 3.** Differential expression level of miR167a and its precursors under different hormone treatments. A, Agarose gel photograph showing resolved amplified products of marker genes designated for specific hormone treatments. B, Relative expression level of mature miR167a in different hormone treated plants. Top panel shows RNA gel blot analysis data and bottom panel shows stem loop real-time RT-PCR data on the same RNA. C, Expression level of precursors of *MIR167a* as determined by real-time PCR analysis. Control, treated with water only; IAA, indole acetic acid; ABA, abscisic acid; SA, salicylic acid; JA, jasmonic acid; ET, ethylene. \*, significantly changed from control.
