# Supplementary material
Source: publisher figshare collection journal article supplement (https://tandf.figshare.com/articles/dataset/_/5493184)
Supplement: Supplementary file 12 [file 1]

Archive with 13 entries (13 files):
- krnb_a_1391438_sm1108.pdf
- krnb_a_1391438_sm1106.pdf
- krnb_a_1391438_sm1105.pdf
- krnb_a_1391438_sm1103.pdf
- krnb_a_1391438_sm1098.pdf
- krnb_a_1391438_sm1095.pdf
- krnb_a_1391438_sm1092.pdf
- krnb_a_1391438_sm1087.pdf
- krnb_a_1391438_sm1080.pdf
- krnb_a_1391438_sm1075.pdf
- krnb_a_1391438_sm1069.pdf
- krnb_a_1391438_sm1066.pdf
- krnb_a_1391438_sm1063.docx
