# Supplementary material
Source: publisher figshare collection journal article supplement (https://tandf.figshare.com/articles/dataset/_/5493184)
Supplement: Supplementary file 12 [file 1 › krnb_a_1391438_sm1063.docx]

To

Renée Schroeder

Editor in Chief

RNA Biology Date: 22nd September 2017

Sub: RNA Biology 2017RNABIOL0147

Dear Prof. Schroeder,

Please find attached the revised manuscript entitled “Distinct transcriptional and processing regulations control miR167a level in tomato during stress” by Jayanti Jodder, Rohit Das, Deepti Sarkar, Payel Bhattacharjee and Pallob Kundu from Division of Plant Biology, Bose Institute, P1/12 CIT Scheme VII(M), Kolkata 700054, India, is being submitted to RNA Biology for publication consideration. This manuscript is new, has not been submitted elsewhere for publication and contains new information.

In this manuscript, we have shown the results of the investigation on the regulatory mechanisms of tomato miR167 biogenesis during stress. Here, we have critically evaluated the level of mature and precursors *MIR167* in plants exposed to an array of biological and environmental stresses. Subsequently, using several molecular biology tools and transgenic promoter-reporter plants we have shown that distinct regulation at transcriptional and processing steps are critical for miR167 expression during a specific stress or if a plant is experiencing different conditions simultaneously. The role of DREB transcription factor in stress-dependent transcriptional regulation has also been established. To the best of our knowledge, this is the first report on delving mechanistic details of expression of miR167 in tomato. We strongly believe the manuscript is appropriate for the journal RNA Biology, and will be of general interest.

Based on our original submission and reviewers comments you have concluded that the manuscript may be acceptable for publication with substantial revisions. We have received two reviewers’ comments regarding the manuscript and the first reviewer praised our study by stating that “This work would provide insights to understand how plants fine-tune miRNA expression under multiple stress conditions”, “The data in this manuscript looks good in general” and “well prepared”. The second reviewer appreciated the work by stating “This is an interesting paper on the regulation of miR-167a levels during stress. Overall, the findings are well-supported by the data”. However, both the reviewers have also raised several other pertinent issues, mostly regarding the improvement in clarity of the text.

We have addressed the reviewers’ all concerns and modified the manuscript by including additional experiments, texts, rearrangement of texts, changing the data presentation style as recommended and some of the figures have been rearranged. The reviewers are seeking explanations/modifications in majority of the issues raised by them, therefore, we have included our answers in the “response to the reviewers” document.

We sincerely thank you for your effort and the anonymous reviewers for critically assessing the manuscript, salient observations and their comments which have helped us in improving the manuscript.

Thank you in advance for your kind attention.

Sincerely,

[Pallob Kundu]

Dr. Pallob Kundu

Associate Professor

Division of Plant Biology

Bose Institute, Centenary Campus

P 1/12 CIT Scheme VII(M), Kolkata, West Bengal,700 054

India

Tel.(91)(33)2569 3298

e mail: [pkundu@jcbose.ac.in](mailto:pkundu@jcbose.ac.in)

URL: http://www.boseinst.ernet.in/faculty-details/pallob-kundu
