# Supplementary material
Source: publisher figshare collection journal article supplement (https://tandf.figshare.com/articles/dataset/_/5493184)
Supplement: Supplementary file 12 [file 1 › krnb_a_1391438_sm1092.pdf]

-1172

GGGACATATACAAAGAGTGACAATTGCCGCTAATAATATATATTTAGCGACAATTAAAAATTAAATACCTCTAATG  
ATCATTGTTTGTATAGTG GATTTGAACATATTTGTAAGTGAAATATGTTTTGAGTATATATATATATACACACTACTCT  
TAACATAATTTGAATTAAACAGAAAACGAAAGCTATAGTTATAAGAATAATTAAGTAAATAA TAGTACATTTATCTTAAA  
TATTTTCATTTTCTT CAAATGATAAGGTCATA CTCAATCAAACGGAAATAAAAAGTATTGATTTGATTCTCACCACCATA  
CATTTAAAAAGAAAAAGAAAATTATAGCTTTAACTCGTTAAGAAAAAAGAATCAAACGCGCATGTGATTTT TCGCGAT  
-783  
TAGGATGAAAGGGTCCCCCACCTTCCAACCCTTAAGTTAATAAATGCTCTTACAAAATATAGAACTCACACTAACCTAT  
CTGCAATCTGCATGGTGGCTAGTCTTGGCGTGACAATATTCAATTTGTATCACTTGGCTTTGGGACCACCCTTTACATCA  
ACATATAAATATATTGTTGCTCCTATTTTATATAAATTTT CCGTCTATTTTACATGTTTCATCGTATATTAAAAATATA  
-576  
TATTTAATTTAAAAAATT TAAAAGATAATTTTAT TATTTTATATAATTTTTGTCTTTGTTATTAAATATTTAGATGACT  
CATTACTATGATATACATTACTAATAAAATTACTATTTTTATTTT TGACCATCTTTTAATTTTTGAATCGA CGAGAAAA  
AAATACATTTTTTATGGAAAAATAGAAGTTTCTTATCATTTAACTAAGAATTTTTTCAA TCATACATTGTTTCAGCGAGT  
-316  
GAAATGAGTTAGAGAAATCATGTTTTATAGTTCAAATTTTTTACTAAGTCTGTTGGAATTACTAATA ACTTTTGCTTGT  
GGA AATTATAGTAAAATTTTCATTTTAAAGAACGTA TATTAAGTTAATTATAA ACAAGTAAAAATGA ACCGACAAAATA  
TCATTTATTTTTTGGACACCCTTTTAATTTCTT CACCAATAT TTATTAATTTCTCTTTTAAAGTGATTATTCCTTTT  
+1  
ATTTTTCTTCTCACACCCCTATTTATACCCCTAGCCCTCTTTGTTGAGAAAGTC ATATAAAGTTAGGTCTCTTCTTCT  
TSS  
TCTTCTTCAACAATATTAGGGTTTTGTCATATTGATAGCGTAGACTAC

|                                                                                     |                   |                                                                                     |                     |
|-------------------------------------------------------------------------------------|-------------------|-------------------------------------------------------------------------------------|---------------------|
| 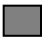 | L1-Box            | 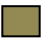 | Heat shock elements |
| 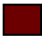 | GT-Box elements   | 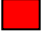 | W-Box               |
| 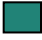 | CAAT-Box elements | 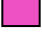 | GA regulated MYB    |
| 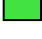 | CRT/DRE elements  | 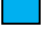 | Plant I-Box         |
| 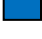 | Evening elements  | 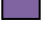 | NAC2 elements       |

**Supplementary figure 5.** Promoter sequence of *MIR167a* gene showing putative transcription factor binding sites. Boundary of different deletion fragments of the promoter are marked with blue bigger font and the length is shown below the letter. TSS, transcription start site.
